# Supplementary material for: Service delivery models for injectable opioid agonist treatment in Canada: 2 sequential environmental scans
Source: PubMed Central journal article supplement — CMAJ Open. 2021 Feb 16;9(1):E115–24. doi: 10.9778/cmajo.20200021 (PMC8034381; doi:10.9778/cmajo.20200021), 2021-02-16
Supplement: supp_9.1.E115_2020-0021-2-at.pdf [file supp_9.1.E115_2020-0021-2-at.pdf]

Appendix 2 (as supplied by the authors): Summary of service delivery models for injectable opioid agonist treatment (iOAT) in Canada

| Service delivery model  | Description                                                                                                                                                                                                                                                                                                                                                                                                                                                                                                                                                                                                                                                                                                                                                                                                                                 |
|-------------------------|---------------------------------------------------------------------------------------------------------------------------------------------------------------------------------------------------------------------------------------------------------------------------------------------------------------------------------------------------------------------------------------------------------------------------------------------------------------------------------------------------------------------------------------------------------------------------------------------------------------------------------------------------------------------------------------------------------------------------------------------------------------------------------------------------------------------------------------------|
| Comprehensive/dedicated | <ul style="list-style-type: none"> <li>• Dedicated specifically to the delivery of iOAT induction and maintenance by a multidisciplinary team with prescribers onsite</li> <li>• Clinics may be stand-alone or co-located within/near addiction, health, mental health or social services</li> <li>• Other health and social services provided on-site to generate comprehensive “one-stop shop” with wrap-around care for iOAT clients</li> <li>• Access to additional specialist services by referral as required</li> </ul>                                                                                                                                                                                                                                                                                                              |
| Embedded/integrated     | <ul style="list-style-type: none"> <li>• iOAT induction and maintenance embedded within existing health, harm reduction or social services</li> <li>• May be more formalized and share elements of the dedicated model with a separate clinical injection space, client flow and staff, or may be fully integrated within the shared resources and infrastructure of the existing facility</li> <li>• May have a smaller multi-disciplinary staff team; generally, requires ongoing partnership with other community health and social service providers co-located within the same building or immediate vicinity</li> <li>• iOAT prescriber may be located elsewhere; regular visits to the prescriber required by clients to continue maintenance on iOAT and/or prescriber may attend the program setting on a regular basis</li> </ul> |
| Pharmacy-based          | <ul style="list-style-type: none"> <li>• iOAT induction is conducted at a community clinic with transfer to a pharmacy for maintenance once client is stabilized</li> <li>• Ongoing visits to the prescriber (usually at the community clinic) for dose adjustments, primary and addiction care, and other health and social services</li> </ul>                                                                                                                                                                                                                                                                                                                                                                                                                                                                                            |
| Hospital-based          | <ul style="list-style-type: none"> <li>• Inpatients receive iOAT induction or continuation of iOAT maintenance if active in a community program</li> <li>• Close working partnership between hospital clinicians and community iOAT programs to establish best approach to care, and streamline movement between hospital and community to mitigate discontinuation</li> </ul>                                                                                                                                                                                                                                                                                                                                                                                                                                                              |
